# Supplementary material
Source: publisher site journal article supplement (https://www.dovepress.com/article/334933)
Supplement: Supplementary file 1 [file get_supplementary_file.php]

**Supplementary Figure 1.** Survival groups based on presence of prior liver-directed therapy and dNLR. Kaplan-Meier curve of overall survival among the cohorts without and with prior surgery (A and B); without and with prior RFA (C and D) and without and with prior TACE (E and F).


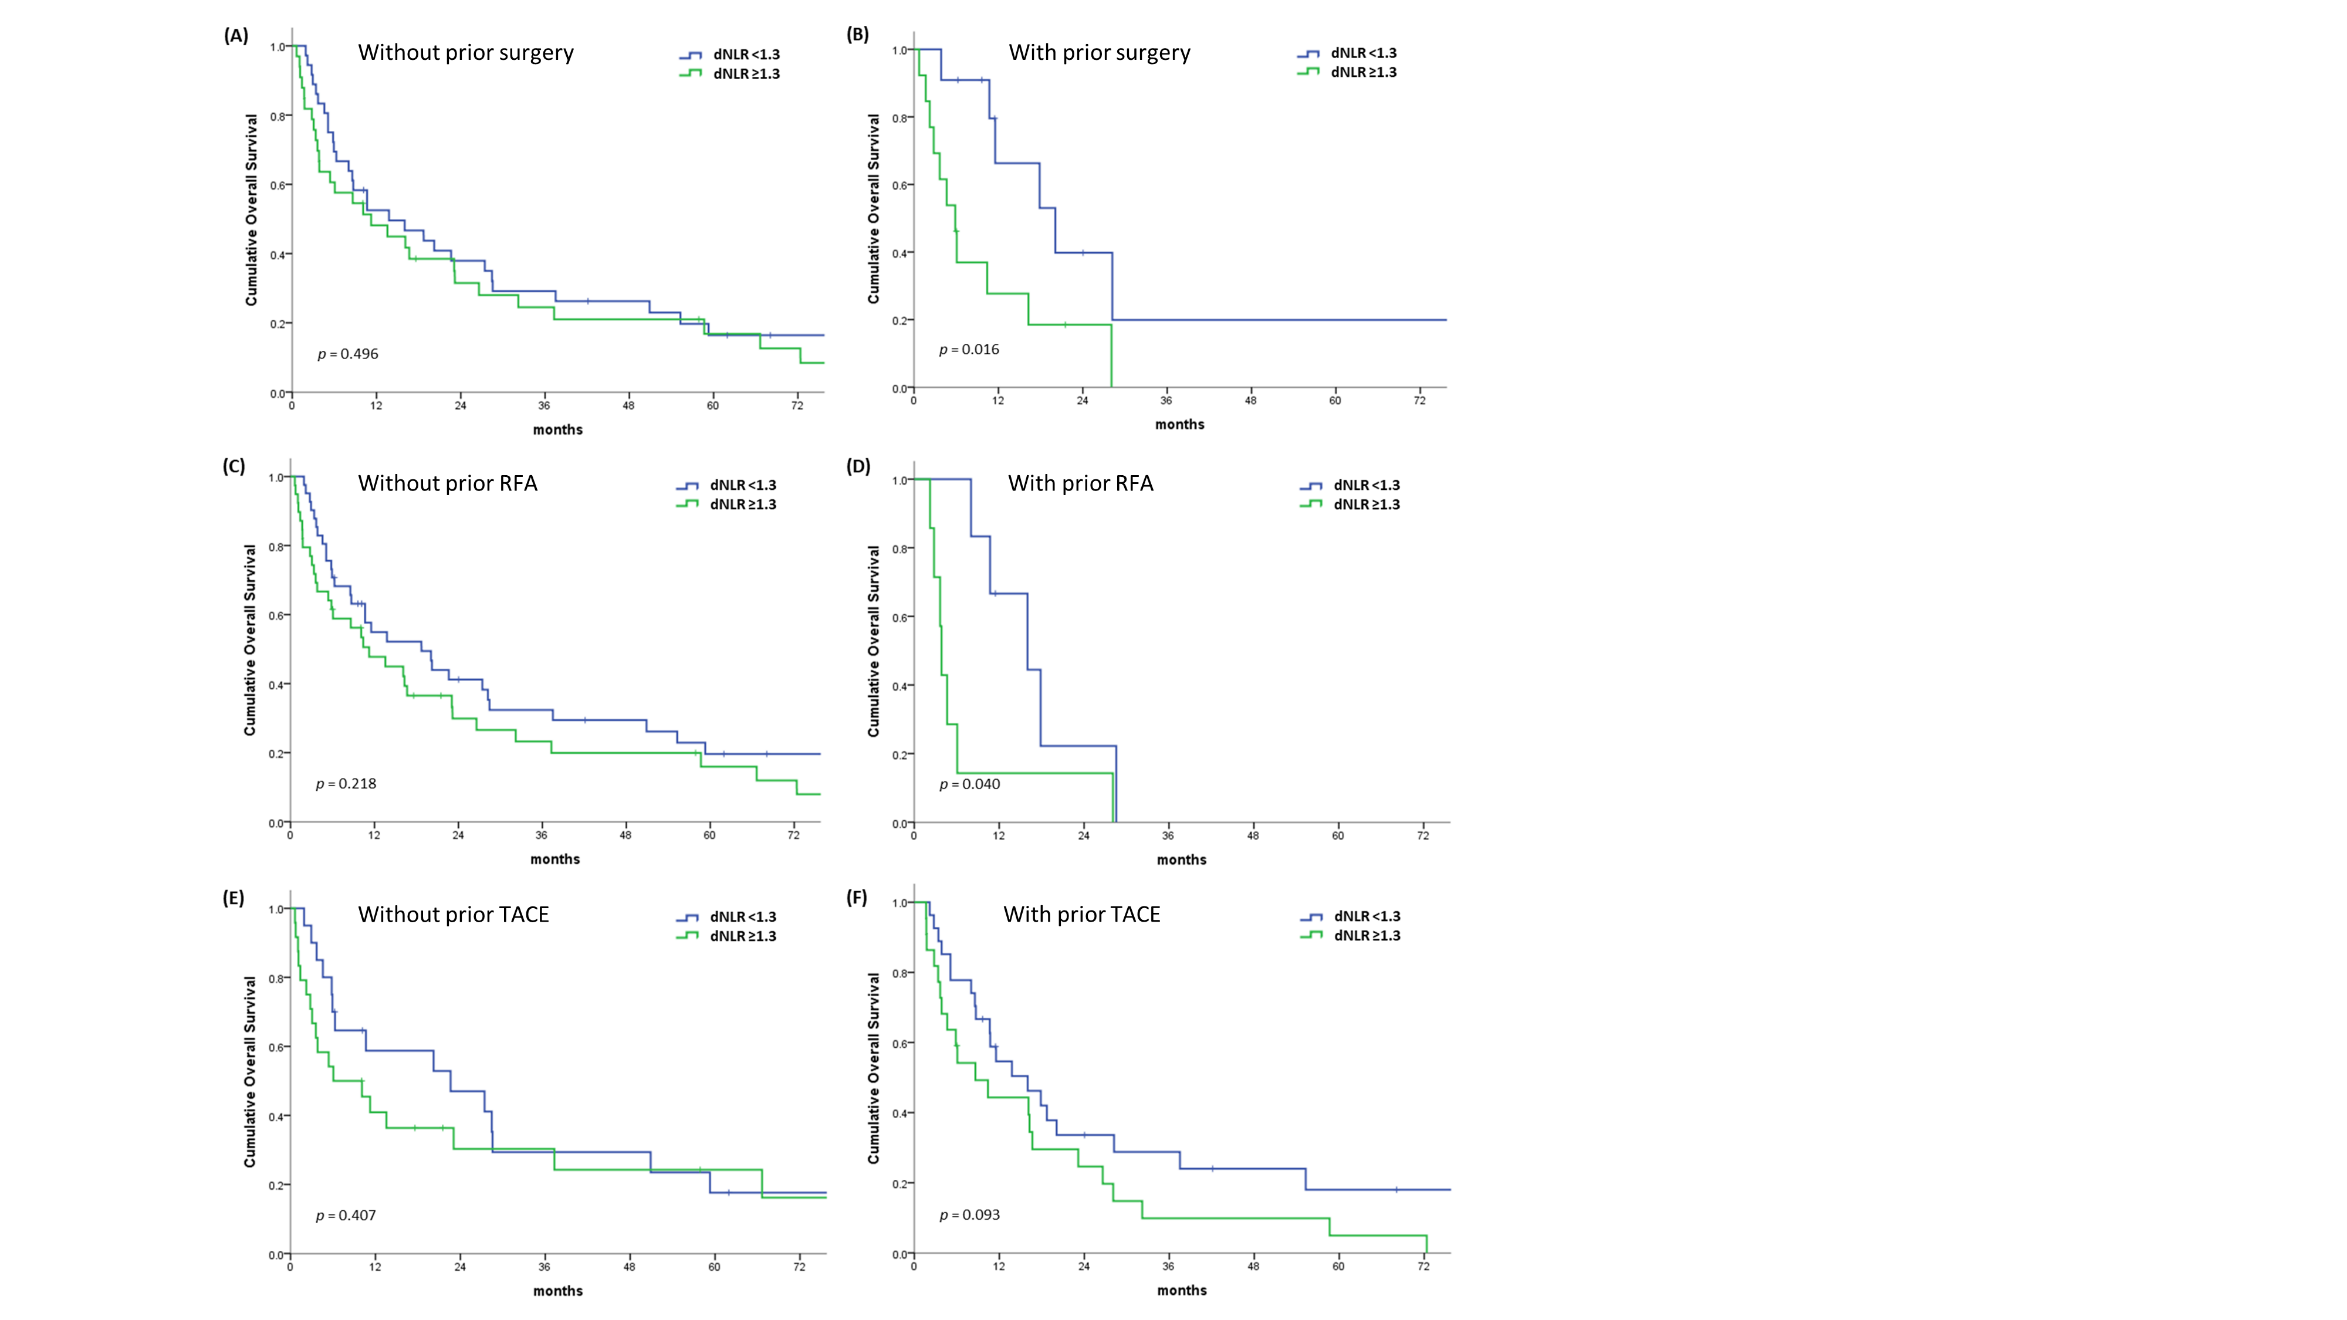


**Supplementary Figure 2.** The receiver operating characteristics curve for dNLR and dPLR for determining the development of liver toxicity. The areas under the curve are 0.746 and 0.634 for dNLR and dPLR, respectively.


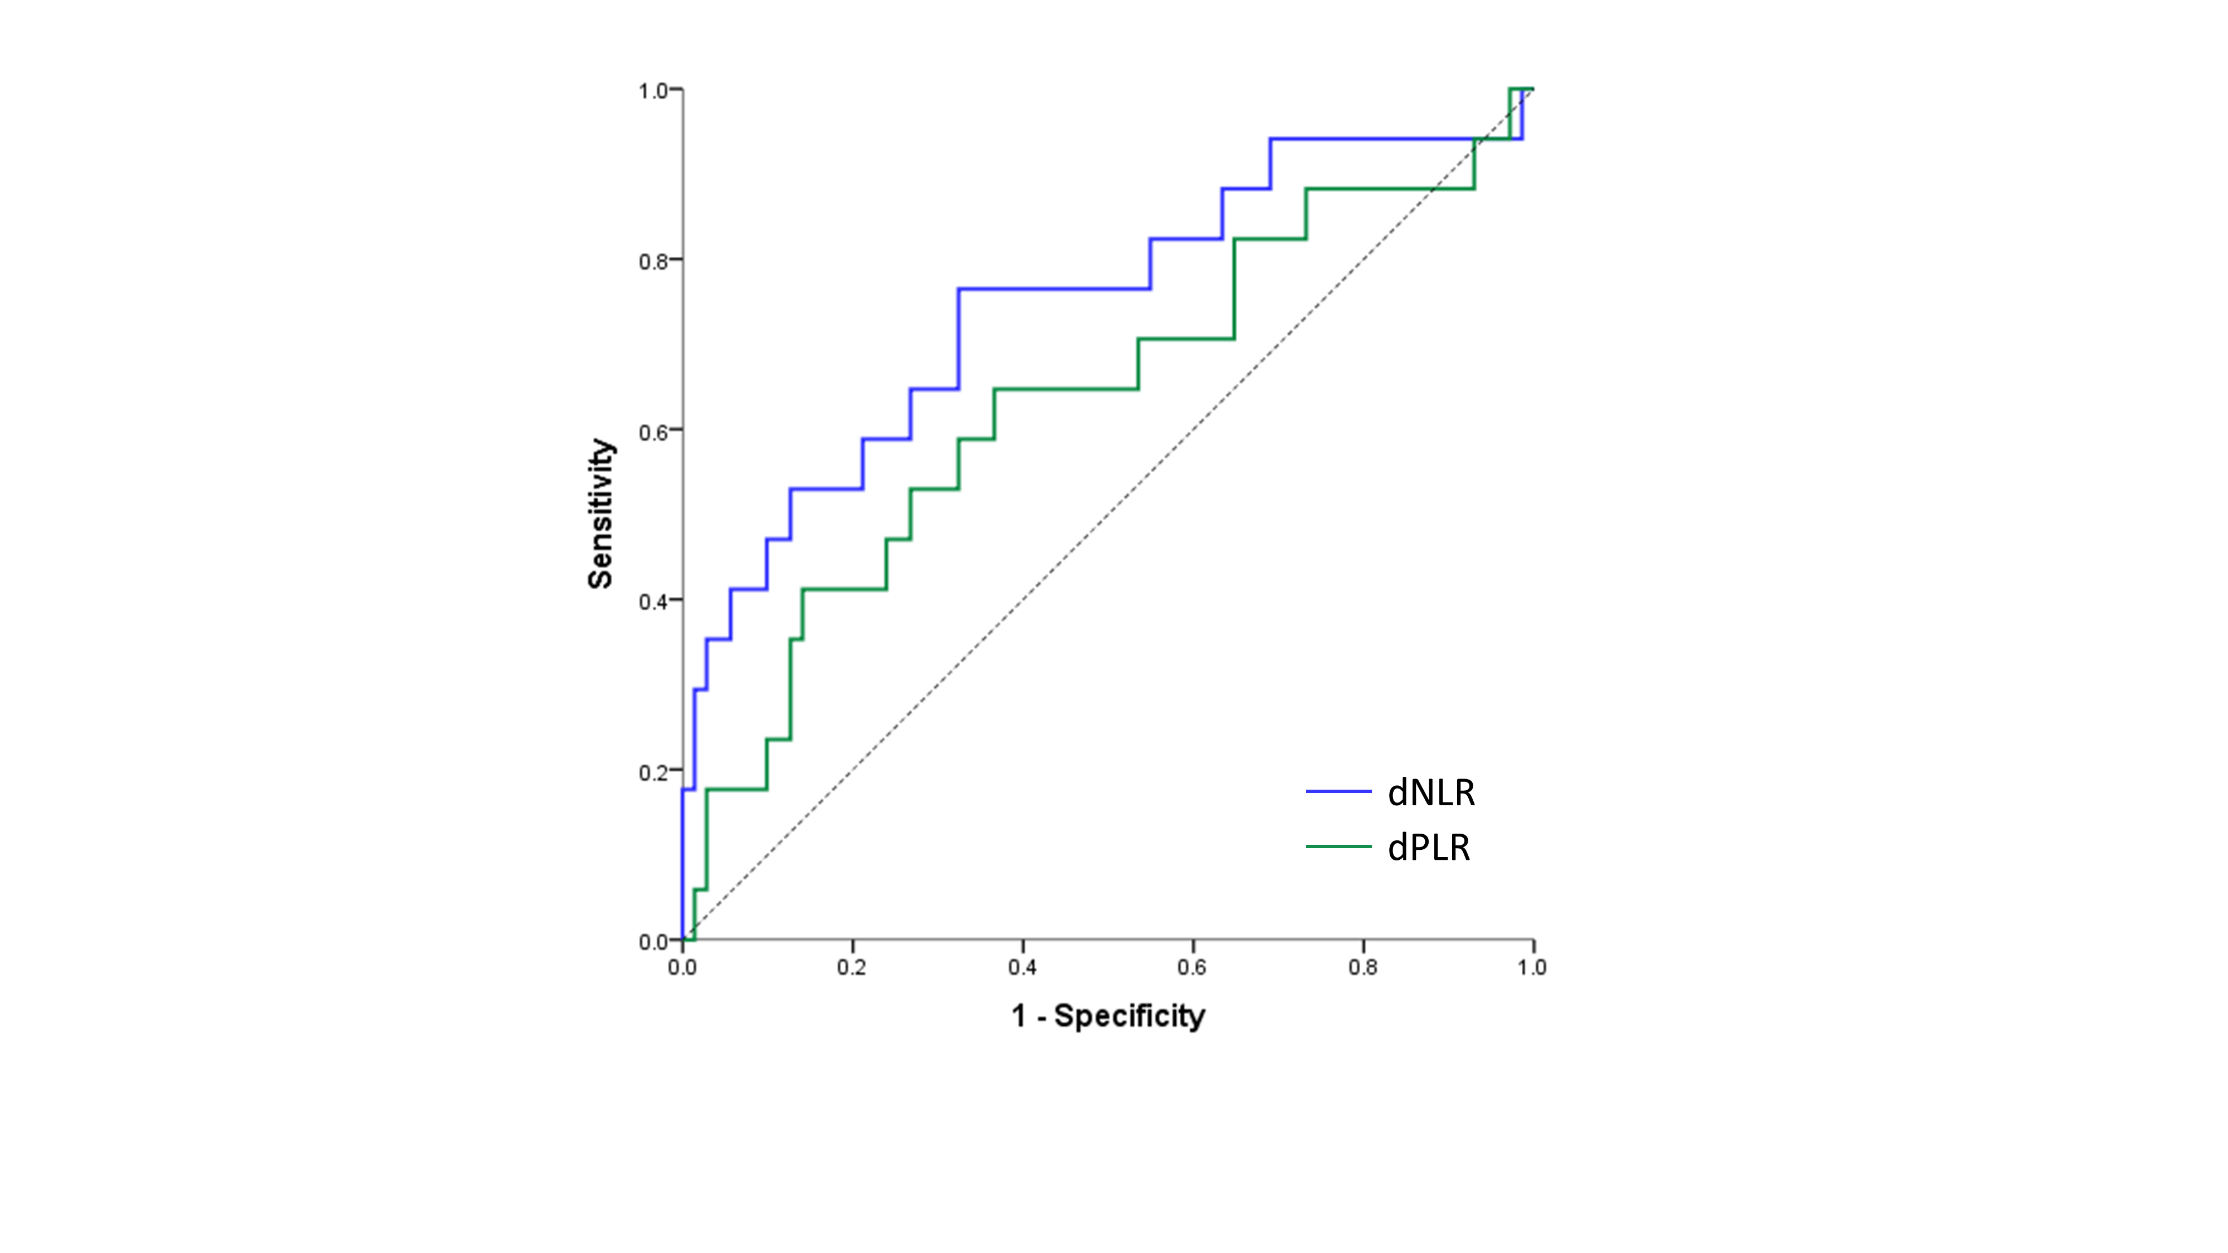


| **Supplementary Table 1.** Prognostic factors on progression-free survival by Cox proportional-hazards model | | | | | | | |
| --- | --- | --- | --- | --- | --- | --- | --- |
|  | UVA | |  | MVA in NLR modal | |  | MVA in PLR model | |
|  | HR (95% CI) | *P* |  | HR (95% CI) | *P* |  | HR (95% CI) | *P* |
| Age >65 years | 0.75 (0.45–1.23) | 0.253 |  |  |  |  |  |  |
| Female vs. male | 0.86 (0.45–1.66) | 0.648 |  |  |  |  |  |  |
| Underlying liver disease |  |  |  |  |  |  |  |  |
| HBV vs. no | 0.95 (0.57–1.60) | 0.860 |  |  |  |  |  |  |
| HCV vs. no | 0.74 (0.42–1.28) | 0.274 |  |  |  |  |  |  |
| CTP class B vs. A | 0.42 (0.21–0.86) | 0.017 |  | 0.59 (0.27–1.29) | 0.185 |  | 0.53 (0.25–1.11) | 0.093 |
| Total GTV (per 10 cc increase) | 0.997 (0.989–1.005) | 0.519 |  |  |  |  |  |  |
| Multiple tumors | 1.93 (1.11–3.35) | 0.020 |  | 1.85 (1.04–3.29) | 0.035 |  | 1.80 (1.01–3.18) | 0.045 |
| Macrovascular invasion | 2.05 (1.21–3.47) | 0.008 |  | 1.74 (0.96–3.16) | 0.069 |  | 1.60 (0.88–2.91) | 0.122 |
| Extrahepatic spread | 2.43 (1.34–4.43) | 0.004 |  | 1.66 (0.81–3.41) | 0.165 |  | 1.85 (0.91–3.75) | 0.090 |
| Performance status ≥2 | 1.45 (0.77–2.74) | 0.248 |  |  |  |  |  |  |
| AFP level ≥400 ng/ml | 2.18 (1.30–3.64) | 0.003 |  | 1.62 (0.91–2.88) | 0.104 |  | 1.72 (0.97–3.07) | 0.065 |
| BED ≥85.5 Gy  Prior treatment no.  0  1-3  >3  Pre-RT Hgb (per 1 g/dL increase)  ASL | 1.55 (0.92–2.60)  Reference  1.28 (0.72–2.26)  1.99 (1.00–3.95)  0.92 (0.82–1.03)  1.28 (0.74–2.21) | 0.098  0.146  0.398  0.050  0.150  0.374 |  | 1.79 (1.04–3.09) | 0.035 |  | 1.81 (1.03–3.19) | 0.039 |
| Pre-RT NLR (per 1-unit increase)  Delta-NLR (per 1-unit increase)  Pre-RT PLR (per 10-unit increase)  Delta-PLR (per 10-unit increase) | 1.18 (1.07–1.29)  0.91 (0.83–0.99)  1.04 (1.01–1.07)  0.99 (0.97–1.01) | 0.001  0.030  0.009  0.241 |  | 1.12 (1.00–1.27)  0.96 (0.88–1.05) | 0.057  0.357 |  | 1.02 (0.99–1.06) | 0.253 |
| Abbreviations: AFP, α-fetoprotein; ASL, acute severe lymphopenia; BED, biologically effective dose; CI, confidence interval; CTP, Child-Turcotte-Pugh liver function scale; GTV, gross tumor volume; HBV, hepatitis B virus; HCV, hepatitis C virus; Hgb, hemoglobin; HR, hazard ratio; MVA, multivariable analysis; NLR, neutrophil-to-lymphocyte ratio; OS, overall survival; PLR, platelet-to-lymphocyte ratio; RT, radiotherapy; UVA, univariable analysis | | | | | | | | |

| **Supplementary Table 2.**  Clinicopathologic and dosimetric characteristics separated by delta-NLR level | | | |
| --- | --- | --- | --- |
| Parameters | dNLR <1.3  (n = 47) | dNLR ≥1.3  (n = 46) | *P* |
| Age >65 years | 25 | 21 | 0.536 |
| Male | 33 | 39 | 0.136 |
| HBV | 27 | 30 | 0.525 |
| HCV | 17 | 14 | 0.661 |
| CTP class B | 8 | 20 | 0.007 |
| Total GTV, cc | 206 ± 279 | 309 ± 401 | 0.112 |
| PTV, cc | 286 ± 366 | 396 ± 451 | 0.157 |
| Multiple tumors | 30 | 34 | 0.372 |
| Macrovascular invasion | 14 | 20 | 0.200 |
| Extrahepatic spread | 14 | 11 | 0.641 |
| Performance status ≥2 | 8 | 13 | 0.223 |
| AFP level ≥400 ng/ml | 21 | 19 | 0.835 |
| BED ≥85.5 Gy | 26 | 23 | 0.680 |
| White blood cell count, × 109/L | 5.4 ± 2.8 | 6.1 ± 2.8 | 0.185 |
| Neutrophil count, × 109/L | 3.5 ± 2.2 | 4.1 ± 2.5 | 0.155 |
| Lymphocyte count, × 109/L | 1.2 ± 0.6 | 1.3 ± 0.6 | 0.219 |
| Hemoglobin, g/dL | 12.0 ± 2.2 | 12.3 ± 1.7 | 0.596 |
| Platelet count, × 109/L | 148.7 ± 96.5 | 142.4 ± 73.3 | 0.827 |
| Pre-SBRT NLR | 3.6 ± 2.5 | 3.5 ± 2.4 | 0.945 |
| *Dosimetry* |  |  |  |
| Normal liver volume, cc | 1262 ± 439 | 1439 ± 514 | 0.943 |
| V5, % | 66.2 ± 20.1 | 70.7 ± 18.9 | 0.066 |
| V10, % | 43.4 ± 19.1 | 44.1 ± 16.8 | 0.177 |
| V15, % | 26.9 ± 12.2 | 26.8 ± 11.1 | 0.739 |
| V20, % | 16.8 ± 8.7 | 17.4 ± 7.5 | 0.722 |
| rV5, cc | 410 ± 249 | 427 ± 376 | 0.156 |
| rV10, cc | 709 ± 320 | 802 ± 411 | 0.576 |
| rV15, cc | 932 ± 346 | 1037 ± 420 | 0.979 |
| rV20, cc | 1074 ± 388 | 1191 ± 453 | 0.906 |
| * Data are presented as number or mean ± standard deviation  Abbreviations: AFP, α-fetoprotein; BED, biologically effective dose; CTP, Child-Turcotte-Pugh liver function scale; GTV, gross tumor volume; HBV, hepatitis B virus; HCV, hepatitis C virus; NLR, neutrophil-to-lymphocyte ratio; PTV, planning target volume; rVx, the volume of liver receiving < x Gy; Vx, the percentage of liver receiving “x” Gy | | | |
